# Supplementary material
Source: publisher figshare collection journal article supplement (https://acs.figshare.com/ndownloader/files/5959248)
Supplement: Supplementary file 1 [file 5959248]

## **Supporting Information**

# Programmed Transport and Release of Cells by Self-Propelled Micromotors

*Yoshitaka Yoshizumi, Kyohei Okubo, Masatoshi Yokokawa, Hiroaki Suzuki\**

Graduate School of Pure and Applied Sciences, University of Tsukuba, 1-1-1 Tennodai, Tsukuba, Ibaraki 305-8573, Japan

\*E-mail: [hsuzuki@ims.tsukuba.ac.jp](mailto:hsuzuki@ims.tsukuba.ac.jp)

### **Table of Contents**

|                                                |    |
|------------------------------------------------|----|
| Descriptions for Supporting Information Videos | S2 |
| Estimation of the Micromotor Running Time      | S2 |
| Relaxation Time of Micromotor Inertial Motion  | S2 |
| Figure S1                                      | S4 |
| Figure S2                                      | S4 |
| Figure S3                                      | S5 |
| Figure S4                                      | S5 |

### Supporting Information Videos.

**Video S1.** Zn/Pt micromotors moving in 100 mM aqueous methanol solution for 5 min under the condition used in Figure 2A (left).

**Video S2.** Zn/Ni/Pt micromotor moving in a 100 mM aqueous methanol solution in presence and absence of a magnetic field for 4 min. The motor used was the same as the one in Figure 4B.

**Video S3.** Zn/Pt/SAM micromotor with *E. coli* moving in a 100 mM aqueous methanol solution for 5 min. The motor used was the same as the one in Figure 7A,B. The trajectory of the Zn/Pt micromotor is shown in the same video, which was modified to run at a speed of 20× compared to real time.

**Estimation of the Micromotor Running Time.** The running time,  $T$ , of the motor is determined by the reaction  $\text{Zn} \rightarrow \text{Zn}^{2+} + 2\text{e}^-$  and estimated from the equation  $T = 2N_{\text{Zn}}/n_{\text{e}}$ . Here,  $N_{\text{Zn}}$  and  $n_{\text{e}}$  are the mole number of zinc on a Zn/Pt micromotor and the mole number of electrons per unit time, respectively.  $N_{\text{Zn}}$  is calculated to be  $5.1 \times 10^{-13}$  mol using the motor radius (2.5  $\mu\text{m}$ ), zinc layer thickness (300 nm) and density (7.14 g/cm<sup>3</sup>), and the atomic weight (65.4) of zinc. A value of  $1.6 \times 10^{-18}$  mol/s is obtained for  $n_{\text{e}}$  from the current density in Figure 2B ( $\sim 1 \times 10^{-6}$  A/cm<sup>2</sup>), zinc surface area ( $2\pi(2.5 \times 10^{-4})^2$  cm<sup>2</sup>), and the Faraday constant ( $9.65 \times 10^4$  C/mol). From these values,  $T = 6.4 \times 10^5$  s or  $\sim 180$  h.

**Relaxation Time of Micromotor Inertial Motion.** The relaxation time  $\tau$  is obtained from the equation  $m(d^2x/dt^2) = -6\pi\eta a (dx/dt)$  and is given by  $\tau = 2a^2\rho/(9\eta)$ , where  $a$ ,  $\rho$ ,  $m$ , and  $\eta$  are the radius, density, and mass of the motor, and the dynamic viscosity of the solution, respectively. The glide distance  $L = \tau v_0 (1 - 1/e)$  is then calculated using a typical initial velocity of  $v_0 = 1.0$

$\mu\text{m/s}$ ,  $a = 2.5 \mu\text{m}$ ,  $m = 2.5 \times 10^{-13} \text{ kg}$ , calculated from the densities of polystyrene ( $1.05 \text{ g/cm}^3$ ), platinum ( $21.5 \text{ g/cm}^3$ ), gold ( $19.3 \text{ g/cm}^3$ ), nickel ( $8.90 \text{ g/cm}^3$ ), and zinc ( $7.14 \text{ g/cm}^3$ ), and the layers of platinum, gold, nickel (50 nm thick each), and zinc (300 nm thick), and  $\eta = 0.890 \times 10^{-3} \text{ Pa s}$ . From these values,  $L = 3.7 \times 10^{-12} \text{ m}$ .

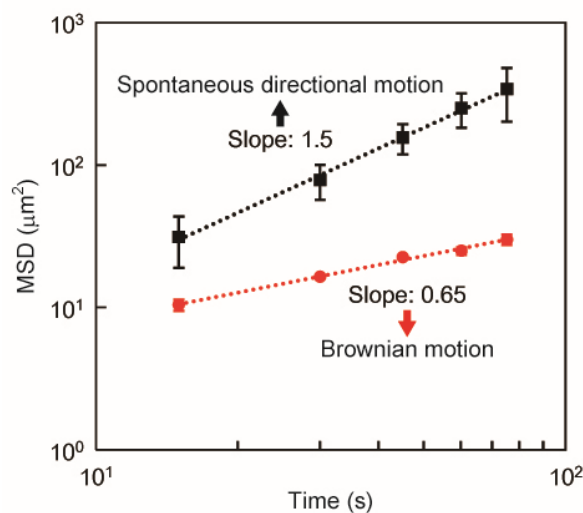

**Figure S1.** Double logarithmic plot of Figure 3. MSD values of the Zn/Pt micromotors (solid black squares) and the Au/Pt beads (solid red circles) in 100 mM aqueous methanol solution are plotted against time. The error bars are standard deviations and correspond to those in Figure 3.

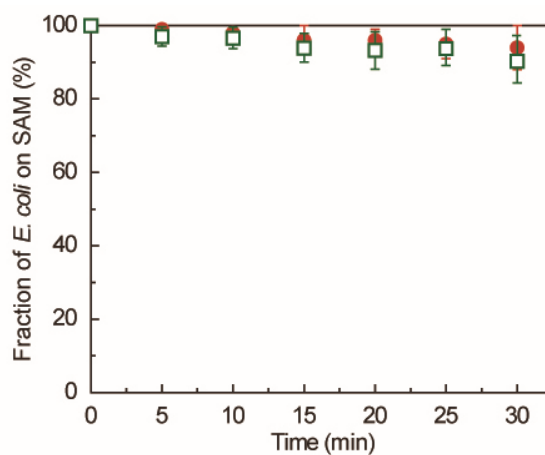

**Figure S2.** Influence of methanol on the release of *E. coli* from the Zn/Pt/SAM composite planar electrode. The number of residual *E. coli* cells on the surface was counted every 5 min after changing the phase to 1.0 mM aqueous  $\text{ZnCl}_2$  solution (solid red circles) and 1.0 mM  $\text{ZnCl}_2$ /100 mM methanol aqueous solution (open green squares). The solid red circles in this figure correspond to the ones in Figure 6C. Averages and standard deviations are shown ( $n = 5$ ).

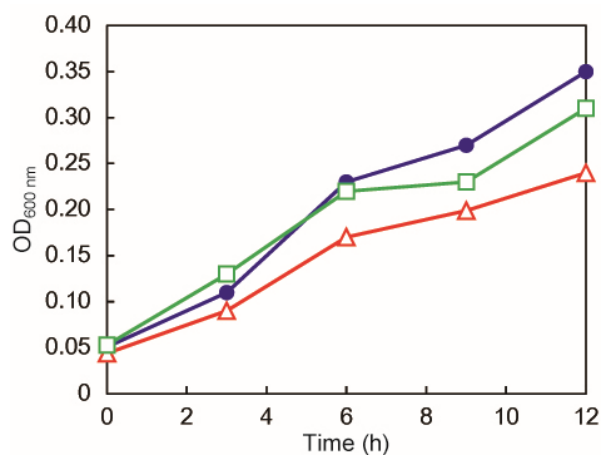

**Figure S3.** Growth curves of *E. coli* after immersion in 100 mM aqueous methanol solution (open red triangles), culture medium (control, solid blue circles), and 1.0 mM aqueous ZnCl<sub>2</sub> solution (open green squares) for 1 h at room temperature. Culturing was conducted at 37 °C, and the initial concentration of *E. coli* was adjusted to an OD<sub>600</sub> of 0.05 by dilution with PBS before the OD measurements.

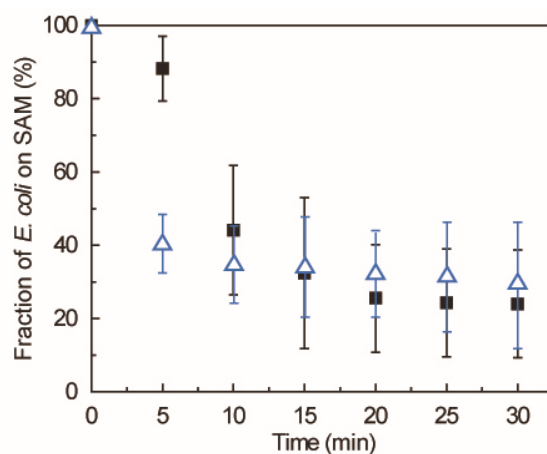

**Figure S4.** Ratio of residual *E. coli* cells on a planar platinum electrode modified with 1-decanethiol (solid black squares) and 1-hexanethiol (open blue triangles). The solid black squares in this figure correspond to the ones in Figure 6C. Averages and standard deviations are shown ( $n = 5$ ).
